# Supplementary material for: Gestational Diabetes Mellitus and Small-for-Gestational-Age: An Insight into the Placental Molecular Biomarkers
Source: MDPI journal article supplement (doi:10.3390/ijms24032240), 2023-01-23
Supplement: s1 [file s1]

# Gestational Diabetes Mellitus and Small-For-Gestational-Age: An Insight into the Placental Molecular Biomarkers

Christian Giommi <sup>1,2,†</sup>, Marta Lombó <sup>1,2,3,†</sup>, Nina Montik <sup>4</sup>, Michela Paolucci <sup>4</sup>, Valentina Notarstefano <sup>1</sup>, Giovanni Delli Carpini <sup>4</sup>, Andrea Ciavattini <sup>4</sup>, Antonio Ragusa <sup>5</sup>, Francesca Maradonna <sup>1,2,\*</sup>, Elisabetta Giorgini <sup>1,‡</sup>, and Oliana Carnevali <sup>1,2,\*</sup>

<sup>1</sup> Department of Life and Environmental Sciences, Università Politecnica delle Marche, 60131 Ancona, Italy

<sup>2</sup> INBB—Consorzio Interuniversitario di Biosistemi e Biostrutture, 00136 Roma, Italy

<sup>3</sup> Department of Molecular Biology, Faculty of Biology and Environmental Sciences, Universidad de León, 24071 León, Spain

<sup>4</sup> Department of Odontostomatological and Specialized Clinical Sciences, Università Politecnica delle Marche, 60020 Ancona, Italy

<sup>5</sup> Department of Obstetrics and Gynecology, Università Campus Bio Medico di Roma, 00128 Roma, Italy

† these authors contributed equally as first authors

‡ these authors contributed equally as co-last authors

\* Correspondence: f.maradonna@staff.univpm.it (F.M.) and o.carnevali@staff.univpm.it (O.C.)

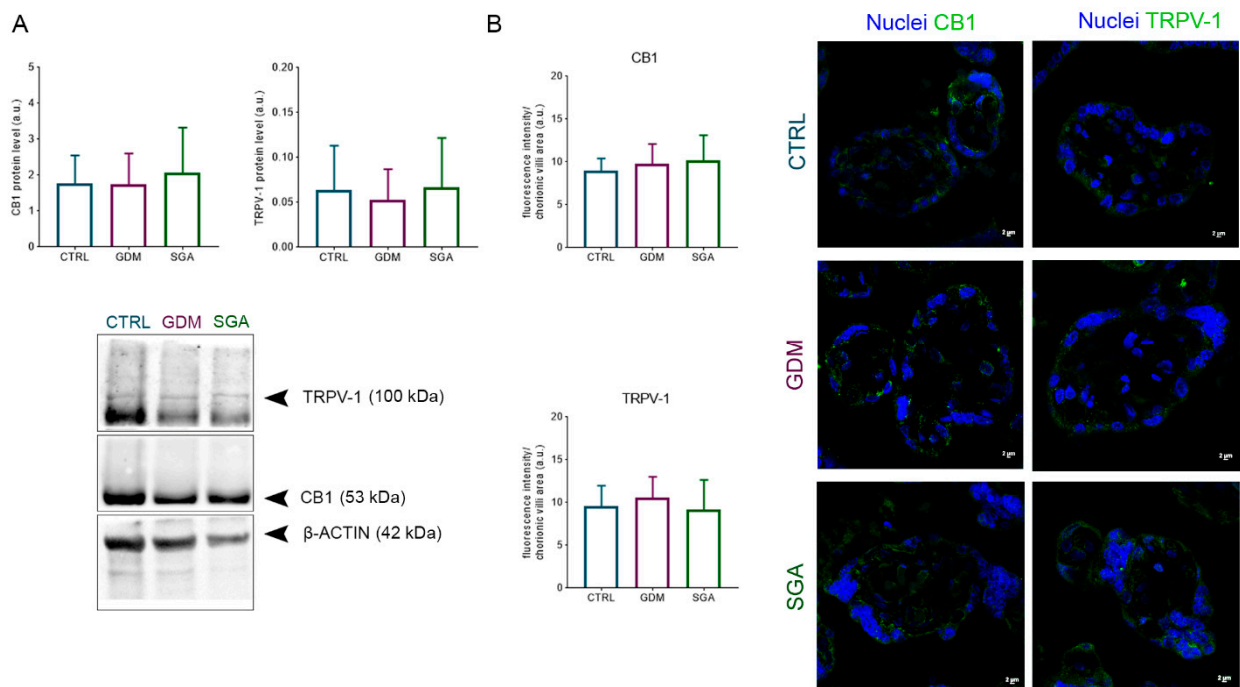

**Supplementary Figure S1.** Relative levels of endocannabinoid receptors in the control and pathological placenta slices (A). Bars represent the densitometric analysis of CB1 (53 kDa) /  $\beta$ -actin (42 kDa) ratio and TRPV-1 (100 kDa) /  $\beta$ -actin (42 kDa)  $\pm$  SD of twelve independent replicates ( $n = 12$ ). Analysis of the CB1 and TRPV-1 levels in chorionic villi by immunohistochemistry (B). Bars represent the fluorescence intensity per area of chorionic villi  $\pm$  SD of five independent samples ( $n = 5$ ). In confocal images, nuclei are marked with DAPI (blue) and CB1 or TRPV-1 are marked in green (Alexa Fluor® 488); scale bar = 2  $\mu$ m.
